# Supplementary material for: Fully integrated high quality factor &lt;i&gt;G&lt;/i&gt;&lt;sub&gt;m&lt;/sub&gt;&lt;i&gt;C&lt;/i&gt; bandpass filter stage with highly linear operational transconductance amplifier
Source: Copernicus journal article supplement (doi:10.5194/ars-15-149-2017), 2017-09-21
Supplement: Supplementary file 1 [file ars-15-149-2017-supplement.zip]

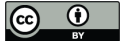

## *Supplement of*

# **Fully integrated high quality factor $G_m C$ bandpass filter stage with highly linear operational transconductance amplifier**

**Jochen Briem et al.**

*Correspondence to:* Jochen Briem ([jochen.briem@int.uni-stuttgart.de](mailto:jochen.briem@int.uni-stuttgart.de))

- [ars-15-149-2017-supplement-title-page.pdf](#)
- [Dat1.txt](#)
- [Dat2.txt](#)
- [Dat3.txt](#)
- [Dat4.txt](#)
- [Dat5.txt](#)
- [Dat6.txt](#)
- [FF.l.1.txt](#)
- [FS.l.1.txt](#)
- [SF.l.1.txt](#)
- [SS.l.1.txt](#)
- [TT.l.1.txt](#)
- [filter\\_time\\_dat.svg](#)
- [gmR\\_dat.svg](#)

The copyright of individual parts of the supplement might differ from the CC BY 3.0 License.
